# Supplementary material
Source: MDPI journal article supplement (https://www.mdpi.com/search?q=jcm-10-00509)
Supplement: s001 [file jcm-10-00509-s001.pdf]

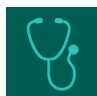

**Supplementary Materials**

**Table S1.** PubMed search strings.

| <b>Search number</b> | <b>Query</b>                                                                                                                                                                                                                                                                                                                                                                                                                                                                                                                                                                                                                                                                                                                                                                                                                                                                                             | <b>Results</b> |
|----------------------|----------------------------------------------------------------------------------------------------------------------------------------------------------------------------------------------------------------------------------------------------------------------------------------------------------------------------------------------------------------------------------------------------------------------------------------------------------------------------------------------------------------------------------------------------------------------------------------------------------------------------------------------------------------------------------------------------------------------------------------------------------------------------------------------------------------------------------------------------------------------------------------------------------|----------------|
| 2                    | ((arthritis, rheumatoid[MeSH Major Topic]) OR (rheumatoid arthritis[Title]))                                                                                                                                                                                                                                                                                                                                                                                                                                                                                                                                                                                                                                                                                                                                                                                                                             | 16 739         |
| 3                    | ((cardiovascular[Title] OR heart[Title] OR hypertension[Title] OR atrial[Title] OR coronary[Title]))                                                                                                                                                                                                                                                                                                                                                                                                                                                                                                                                                                                                                                                                                                                                                                                                     | 163 368        |
| 4                    | ((infection[Title] OR infections[Title]))                                                                                                                                                                                                                                                                                                                                                                                                                                                                                                                                                                                                                                                                                                                                                                                                                                                                | 91 892         |
| 5                    | ((lymphoma[Title] OR lymphomas[Title]))                                                                                                                                                                                                                                                                                                                                                                                                                                                                                                                                                                                                                                                                                                                                                                                                                                                                  | 21 457         |
| 6                    | (((((squamous cell carcinoma[Title] OR squamous cell carcinomas[Title] OR SCC[Title]))) OR ((basal cell carcinoma[Title] OR basal cell carcinomas[Title] OR BCC[Title]))) AND ("non-melanoma skin cancer"[Title] OR "non melanoma skin cancer"[Title]))                                                                                                                                                                                                                                                                                                                                                                                                                                                                                                                                                                                                                                                  | 210            |
| 7                    | ((prevalence[MeSH Major Topic]) OR (prevalence[Title]))                                                                                                                                                                                                                                                                                                                                                                                                                                                                                                                                                                                                                                                                                                                                                                                                                                                  | 40 667         |
| 8                    | (((((risk factors[MeSH Major Topic]) OR (pathology[MeSH Major Topic])) OR (inflammation[MeSH Major Topic])) OR (risk factor[Title] OR risk factors[Title] OR pathology[Title] OR pathogenesis[Title] OR etiology[Title] OR inflammation[Title] OR inflammatory[Title] OR cause[Title] OR causes[Title] OR screening[Title]))))                                                                                                                                                                                                                                                                                                                                                                                                                                                                                                                                                                           | 230 721        |
| 9                    | ((((((((((quality of life[MeSH Major Topic]) OR (pain[MeSH Major Topic])) OR (patient reported outcome measures[MeSH Major Topic])) OR (outcome assessment, health care[MeSH Major Topic])) OR (treatment outcome[MeSH Major Topic])) OR (fatal outcome[MeSH Major Topic])) OR (disability evaluation[MeSH Major Topic])) OR (economics, medical[MeSH Major Topic])) OR (medication adherence[MeSH Major Topic])) OR ("quality of life"[Title] OR "life quality"[Title] OR "outcome"[Title] OR "outcomes"[Title] OR "fatal"[Title] OR "death"[Title] OR "survival"[Title] OR "burden"[Title] OR "economic"[Title] OR "cost"[Title] OR "adherence"[Title] OR "persistence"[Title] OR "compliance"[Title] OR "management"[Title] OR "decision"[Title] OR "decisions"[Title] OR "impact"[Title] OR "impacts"[Title] OR "effect"[Title] OR "effects"[Title] OR "influence"[Title] OR "influences"[Title])))) | 878 306        |
| 10                   | ((((tumor necrosis factor inhibitors[MeSH Major Topic]) OR (tumour necrosis factor[tiab] OR tumour necrosis factors[Title] OR tumor necrosis factor[Title] OR tumor necrosis factors[Title] OR TNF[Title] OR adalimumab[Title] OR certolizumab[Title] OR golimumab[Title] OR etanercept[Title] OR infliximab[Title] OR biologic[Title] OR bDMARD[Title])))                                                                                                                                                                                                                                                                                                                                                                                                                                                                                                                                               | 16 825         |
| 11                   | ((#2) AND (#3 OR #4 OR #5 OR #6)) AND (#7 OR #8 OR #9 OR #10)                                                                                                                                                                                                                                                                                                                                                                                                                                                                                                                                                                                                                                                                                                                                                                                                                                            | <b>335</b>     |

**Publisher’s Note:** MDPI stays neutral with regard to jurisdictional claims in published maps and institutional affiliations.

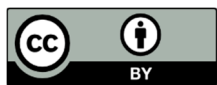

© 2020 by the authors. Submitted for possible open access publication under the terms and conditions of the Creative Commons Attribution (CC BY) license (<http://creativecommons.org/licenses/by/4.0/>).
